# Supplementary material for: Do Semaphorins Play a Role in Development of Fibrosis in Patients with Nonalcoholic Fatty Liver Disease?
Source: MDPI journal article supplement (doi:10.3390/biomedicines10123014), 2022-11-23
Supplement: s1 [file s1]

**SUPPLEMENTARY TABLE S1.****Serum concentrations of semaphorins in patients with non-alcoholic fatty liver disease and healthy controls**

| <b>NAFLD</b>                | <b>SEMA3A</b> | <b>SEMA3C</b> | <b>SEMA4A</b> | <b>SEMA4D</b> | <b>SEMA5A</b> | <b>SEMA7A</b> |
|-----------------------------|---------------|---------------|---------------|---------------|---------------|---------------|
| Minimum                     | 9             | 1,2           | 3,1           | 3,3           | 1,3           | 0,03          |
| 25% Percentile              | 12            | 10            | 4,2           | 13            | 7             | 0,64          |
| Median                      | 16            | 13            | 5,5           | 45            | 21            | 1,2           |
| 75% Percentile              | 22            | 19            | 6,6           | 85            | 44            | 1,7           |
| Maximum                     | 27            | 36            | 32            | 118           | 159           | 3,3           |
| Mean                        | 17            | 15            | 7,4           | 49            | 30            | 1,4           |
| Std. Deviation              | 5,5           | 8,7           | 7,2           | 36            | 32            | 0,9           |
| Std. Error of Mean          | 0,94          | 2,2           | 1,9           | 6,1           | 5,5           | 0,15          |
| <b>HEALTHY CONTROLS</b>     |               |               |               |               |               |               |
|                             | <b>SEMA3A</b> | <b>SEMA3C</b> | <b>SEMA4A</b> | <b>SEMA4D</b> | <b>SEMA5A</b> | <b>SEMA7A</b> |
| Minimum                     | 6,9           | 5,4           | 3,5           | 13            | 0,13          | 0,03          |
| 25% Percentile              | 16            | 13            | 4,7           | 55            | 2,9           | 0,47          |
| Median                      | 22            | 18            | 5,6           | 67            | 8,5           | 0,92          |
| 75% Percentile              | 25            | 32            | 7,5           | 84            | 28            | 1,3           |
| Maximum                     | 68            | 99            | 21            | 135           | 72            | 4,7           |
| Mean                        | 23            | 26            | 6,9           | 70            | 18            | 1             |
| Std. Deviation              | 10            | 21            | 3,5           | 25            | 20            | 0,82          |
| Std. Error of Mean          | 1             | 2,6           | 0,44          | 2,6           | 2,1           | 0,084         |
| p-value                     | 0,0002        | 0,0163        | 0,469         | 0,0004        | 0,009         | 0,0332        |
| Difference                  | -6,5          | -5,1          | -0,14         | -22           | 12            | 0,25          |
| Difference (Hodges-Lehmann) | -5,4          | -5,6          | -0,39         | -24           | 6,5           | 0,29          |
| 95% CI of difference        | -8,4 to -2,3  | -13 to -1,0   | -1,5 to 0,69  | -36 to -10    | 1,4 to 14     | 0,020 to 0,59 |

**SUPPLEMENTARY TABLE S2.****Serum concentrations of semaphorins according to steatosis grade in patients with non-alcoholic fatty liver disease****STEATOSIS****GRADE 3**

|                    | <b>SEMA3A</b> | <b>SEMA3C</b> | <b>SEMA4A</b> | <b>SEMA4D</b> | <b>SEMA5A</b> | <b>SEMA7A</b> |
|--------------------|---------------|---------------|---------------|---------------|---------------|---------------|
| Minimum            | 8             | 5,4           | 3,5           | 31            | 0,13          | 0,03          |
| 25% Percentile     | 16            | 13            | 4,7           | 54            | 2,9           | 0,47          |
| Median             | 22            | 20            | 5,8           | 67            | 8,2           | 0,87          |
| 75% Percentile     | 25            | 35            | 8,5           | 87            | 21            | 1,3           |
| Maximum            | 68            | 99            | 17            | 135           | 57            | 4,7           |
| Mean               | 22            | 28            | 7,2           | 70            | 15            | 0,99          |
| Std. Deviation     | 9,4           | 23            | 3,5           | 25            | 18            | 0,78          |
| Std. Error of Mean | 1,2           | 3,6           | 0,55          | 3,2           | 2,3           | 0,1           |

**STEATOSIS****GRADE 2**

|                    | <b>SEMA3A</b> | <b>SEMA3C</b> | <b>SEMA4A</b> | <b>SEMA4D</b> | <b>SEMA5A</b> | <b>SEMA7A</b> |
|--------------------|---------------|---------------|---------------|---------------|---------------|---------------|
| Minimum            | 7,8           | 8,5           | 3,5           | 29            | 0,37          | 0,03          |
| 25% Percentile     | 19            | 14            | 4,4           | 48            | 2             | 0,5           |
| Median             | 22            | 18            | 5,1           | 67            | 6,1           | 0,83          |
| 75% Percentile     | 28            | 42            | 5,9           | 75            | 33            | 1,1           |
| Maximum            | 51            | 78            | 8,4           | 129           | 54            | 2,3           |
| Mean               | 24            | 29            | 5,3           | 70            | 15            | 0,9           |
| Std. Deviation     | 11            | 23            | 1,4           | 26            | 17            | 0,62          |
| Std. Error of Mean | 2,9           | 7,4           | 0,44          | 6,8           | 4,3           | 0,16          |

**STEATOSIS****GRADE 1**

|                    | <b>SEMA3A</b> | <b>SEMA3C</b> | <b>SEMA4A</b> | <b>SEMA4D</b> | <b>SEMA5A</b> | <b>SEMA7A</b> |
|--------------------|---------------|---------------|---------------|---------------|---------------|---------------|
| Minimum            | 6,9           | 11            | 4,3           | 13            | 0,67          | 0,03          |
| 25% Percentile     | 16            | 13            | 4,7           | 54            | 4             | 0,38          |
| Median             | 23            | 16            | 5,4           | 67            | 18            | 1,2           |
| 75% Percentile     | 34            | 28            | 7,8           | 77            | 56            | 1,9           |
| Maximum            | 54            | 40            | 21            | 129           | 72            | 4             |
| Mean               | 25            | 20            | 7,1           | 69            | 27            | 1,2           |
| Std. Deviation     | 12            | 9,2           | 4,5           | 28            | 27            | 1             |
| Std. Error of Mean | 2,5           | 2,5           | 1,2           | 6             | 5,7           | 0,22          |

**SUPPLEMENTARY TABLE S3.**

**Serum concentrations of semaphorins according to fibrosis stage in patients with non-alcoholic fatty liver disease**

**FIBROSIS STAGE**

| <b>3 and 4</b>     | <b>SEMA3A</b> | <b>SEMA3C</b> | <b>SEMA4A</b> | <b>SEMA4D</b> | <b>SEMA5A</b> | <b>SEMA7A</b> |
|--------------------|---------------|---------------|---------------|---------------|---------------|---------------|
| Minimum            | 6,9           | 64            | 6             | 13            | 0,24          | 0,1           |
| 25% Percentile     | 12            | 68            | 6,1           | 65            | 2,2           | 0,47          |
| Median             | 15            | 88            | 6,4           | 84            | 5,5           | 0,82          |
| 75% Percentile     | 20            | 99            | 9,8           | 114           | 10            | 1,1           |
| Maximum            | 28            | 99            | 11            | 135           | 33            | 2,3           |
| Mean               | 15            | 85            | 7,4           | 85            | 7,5           | 0,86          |
| Std. Deviation     | 5,5           | 17            | 2,3           | 33            | 8,3           | 0,54          |
| Std. Error of Mean | 1,5           | 8,3           | 1,2           | 8,9           | 2,2           | 0,15          |

**FIBROSIS**

| <b>STAGE 2</b>     | <b>SEMA3A</b> | <b>SEMA3C</b> | <b>SEMA4A</b> | <b>SEMA4D</b> | <b>SEMA5A</b> | <b>SEMA7A</b> |
|--------------------|---------------|---------------|---------------|---------------|---------------|---------------|
| Minimum            | 7,8           | 21            | 4             | 34            | 0,13          | 0,04          |
| 25% Percentile     | 11            | 21            | 4,4           | 52            | 3,4           | 0,99          |
| Median             | 16            | 26            | 6,7           | 67            | 6,6           | 1,1           |
| 75% Percentile     | 21            | 42            | 10            | 98            | 31            | 1,7           |
| Maximum            | 33            | 53            | 13            | 129           | 56            | 2,6           |
| Mean               | 16            | 30            | 7,1           | 76            | 15            | 1,2           |
| Std. Deviation     | 6,7           | 13            | 3,6           | 29            | 17            | 0,77          |
| Std. Error of Mean | 1,7           | 5,9           | 1,6           | 7,4           | 4,4           | 0,2           |

**FIBROSIS**

| <b>STAGE 1</b>     | <b>SEMA3A</b> | <b>SEMA3C</b> | <b>SEMA4A</b> | <b>SEMA4D</b> | <b>SEMA5A</b> | <b>SEMA7A</b> |
|--------------------|---------------|---------------|---------------|---------------|---------------|---------------|
| Minimum            | 14            | 9,2           | 3,5           | 29            | 0,22          | 0,03          |
| 25% Percentile     | 22            | 13            | 4,5           | 43            | 1,2           | 0,44          |
| Median             | 24            | 16            | 5             | 58            | 8,7           | 0,77          |
| 75% Percentile     | 41            | 24            | 8,5           | 69            | 23            | 1,5           |
| Maximum            | 68            | 37            | 17            | 129           | 54            | 4,7           |
| Mean               | 30            | 19            | 6,8           | 60            | 14            | 1,2           |
| Std. Deviation     | 13            | 9             | 4             | 23            | 16            | 1,1           |
| Std. Error of Mean | 2,6           | 2,2           | 0,96          | 4,5           | 3             | 0,22          |

**NO FIBROSIS**

|                    | <b>SEMA3A</b> | <b>SEMA3C</b> | <b>SEMA4A</b> | <b>SEMA4D</b> | <b>SEMA5A</b> | <b>SEMA7A</b> |
|--------------------|---------------|---------------|---------------|---------------|---------------|---------------|
| Minimum            | 10            | 5,4           | 3,5           | 35            | 0,37          | 0,03          |
| 25% Percentile     | 22            | 13            | 4,7           | 62            | 2,9           | 0,48          |
| Median             | 23            | 15            | 5,6           | 67            | 14            | 0,83          |
| 75% Percentile     | 26            | 30            | 7,6           | 75            | 56            | 1,3           |
| Maximum            | 35            | 88            | 21            | 114           | 72            | 2,4           |
| Mean               | 24            | 23            | 6,8           | 70            | 24            | 0,92          |
| Std. Deviation     | 5,7           | 16            | 3,6           | 19            | 25            | 0,61          |
| Std. Error of Mean | 0,91          | 2,6           | 0,57          | 3,1           | 4,1           | 0,098         |
